# Supplementary material
Source: HighWire-hosted journal article supplement (https://embor.embopress.org/content/embr.201337642)
Supplement: inline-supplementary-material-13 [file inline-supplementary-material-13.pdf]

**Supplementary Table 3.** Non-annotated intergenic transcripts

| ID       | Chr   | Start     | End       | Strand | Fold change in hypoxia | CPC   |
|----------|-------|-----------|-----------|--------|------------------------|-------|
| Novel 1  | chr1  | 202053848 | 202082554 | +      | 1.5                    | -0.63 |
| Novel 2  | chr1  | 202053658 | 202057903 | +      | 1.2                    | -0.6  |
| Novel 3  | chr1  | 202002600 | 202088108 | +      | 1.6                    | -0.56 |
| Novel 4  | chr1  | 201983168 | 202077686 | +      | 1.6                    | 0.84  |
| Novel 5  | chr1  | 181069443 | 181074240 | -      | 1.5                    | -0.95 |
| Novel 6  | chr1  | 148241355 | 148241861 | +      | 1.4                    | -1.32 |
| Novel 7  | chr1  | 107292908 | 107293420 | +      | 1.2                    | -1.04 |
| Novel 8  | chr1  | 107073060 | 107424139 | +      | 1.1                    | 0.73  |
| Novel 9  | chr1  | 106734807 | 106876406 | +      | 0                      | -0.24 |
| Novel 10 | chr1  | 106735450 | 106762265 | +      | 1.1                    | -0.77 |
| Novel 11 | chr1  | 45196573  | 45196842  | -      | 0.3                    | -1.36 |
| Novel 12 | chr10 | 8911651   | 8932114   | +      | 1.1                    | -0.99 |
| Novel 13 | chr10 | 8909994   | 8931788   | +      | 1.3                    | 0.26  |
| Novel 14 | chr10 | 5524638   | 5535702   | -      | 1.4                    | -0.52 |
| Novel 15 | chr11 | 65222490  | 65244737  | +      | 1.7                    | -0.84 |
| Novel 16 | chr12 | 25956136  | 25959121  | +      | 0.8                    | 0.41  |
| Novel 17 | chr12 | 8116260   | 8123253   | -      | 1.5                    | -0.81 |
| Novel 18 | chr15 | 51328348  | 51690847  | +      | 1.4                    | -0.78 |
| Novel 19 | chr16 | 85587072  | 85589839  | -      | 2                      | -0.88 |
| Novel 20 | chr16 | 85495495  | 85603598  | +      | 1.7                    | 0.005 |
| Novel 21 | chr16 | 85479122  | 85498916  | -      | 1.8                    | -0.77 |
| Novel 22 | chr16 | 14395080  | 14494860  | +      | 1.5                    | -0.57 |
| Novel 23 | chr16 | 85496110  | 85524891  | +      | 1.6                    | -0.46 |
| Novel 24 | chr2  | 132300855 | 132350688 | +      | 1.5                    | -0.58 |
| Novel 25 | chr2  | 75136093  | 75145898  | +      | 1.3                    | -0.86 |
| Novel 26 | chr2  | 1571357   | 1629598   | -      | 1.5                    | -0.34 |
| Novel 27 | chr20 | 292339    | 305552    | -      | 1.8                    | -0.87 |
| Novel 28 | chr3  | 64022004  | 64104438  | +      | 1.3                    | -0.79 |
| Novel 29 | chr5  | 177485281 | 177505466 | -      | 1.6                    | -0.73 |
| Novel 30 | chr5  | 172721232 | 172730376 | +      | 1.8                    | 0.43  |
| Novel 31 | chr5  | 102088692 | 102198533 | +      | 1.4                    | -0.86 |
| Novel 32 | chr5  | 66509857  | 66520819  | +      | 1.4                    | -0.87 |
| Novel 33 | chr5  | 66509437  | 66891986  | +      | 1.2                    | 0.75  |
| Novel 34 | chr7  | 157283010 | 157312766 | +      | 1.4                    | -0.27 |
| Novel 35 | chrX  | 95228382  | 95229237  | -      | 1.3                    | 0.02  |
| Novel 36 | chr11 | 70995192  | 70998931  | +      | 1.8                    | -0.52 |
| Novel 37 | chr7  | 129244613 | 129251530 | -      | 1.9                    | -0.99 |
